# Supplementary material for: Facile Functionalization via Plasma-Enhanced Chemical Vapor Deposition for the Effective Filtration of Oily Aerosol
Source: PubMed Central journal article supplement (PMC6780184; doi:10.3390/polym11091490), 2019-09-12
Supplement: polymers-11-01490-s001.pdf [file polymers-11-01490-s001.pdf]

# Facile functionalization via plasma enhanced chemical vapor deposition for effective filtration of oily aerosol

**Sanghyun Roh<sup>1</sup>, Sungmin Kim<sup>1,2</sup>, Jooyoun Kim<sup>1,2</sup> \***

<sup>1</sup>Department of Textiles, Merchandising and Fashion Design, Seoul National University,  
Seoul 08826, Republic of Korea

<sup>2</sup>Research Institute of Human Ecology, Seoul National University, Seoul 08826, Republic of  
Korea

E-mail: \*[jkim256@snu.ac.kr](mailto:jkim256@snu.ac.kr)

Tel.: +82-2-880-6846

**Table S1.** Reference values of surface energy components of liquids

| Liquid                | $\gamma_L$ (mN/m) | $\gamma_L^d$ (mN/m) | $\gamma_L^p$ (mN/m) | P <sub>L</sub> (Polar Ratio) |
|-----------------------|-------------------|---------------------|---------------------|------------------------------|
| Water (WA)            | 72.8              | 21.8                | 51.0                | 0.70                         |
| Methylene iodide (MI) | 50.8              | 50.4                | 0.40                | 0.008                        |

Note:  $\gamma_L$ , overall surface energy of liquid;  $\gamma_L^d$ , dispersive component surface energy of liquid;  $\gamma_L^p$ , polar component surface energy of liquid; P<sub>L</sub>, ratio of the polar component to the overall surface energy of liquid.

$$\gamma_{SL} = \gamma_S + \gamma_L - 2\sqrt{\gamma_S^d \cdot \gamma_L^d} - 2\sqrt{\gamma_S^p \cdot \gamma_L^p} \quad (\text{Eq. S1})$$

$$\gamma_S = \gamma_{SL} + \gamma_L \cos\theta \quad (\text{Eq. S2})$$

$$\gamma_L(1 + \cos\theta) = 2\sqrt{\gamma_S^d \cdot \gamma_L^d} - 2\sqrt{\gamma_S^p \cdot \gamma_L^p} \quad (\text{Eq. S3})$$

$$\gamma_S = \gamma_S^d + \gamma_S^p \quad (\text{Eq. S4})$$

$\theta$ : contact angle of liquid on solid surface

$\gamma_{SL}$ : interfacial energy between solid and liquid

$\gamma_S$ : surface energy of solid

$\gamma_S^d$ : dispersive component surface energy of solid

$\gamma_S^p$ : polar component surface energy of solid

$\gamma_L$ : surface energy of liquid

$\gamma_L^d$ : dispersive component surface energy of liquid

$\gamma_L^p$ : polar component surface energy of liquid

**Table S2.** Solidity and porosity of different webs

| Web                            | Solidity | Porosity (%) |
|--------------------------------|----------|--------------|
| PP SB                          | 0.11     | 89           |
| PP MB                          | 0.10     | 90           |
| PS ES                          | 0.11     | 89           |
| PS <sub>f</sub> ES             | 0.10     | 90           |
| PS <sub>O<sub>2</sub></sub> ES | 0.10     | 90           |

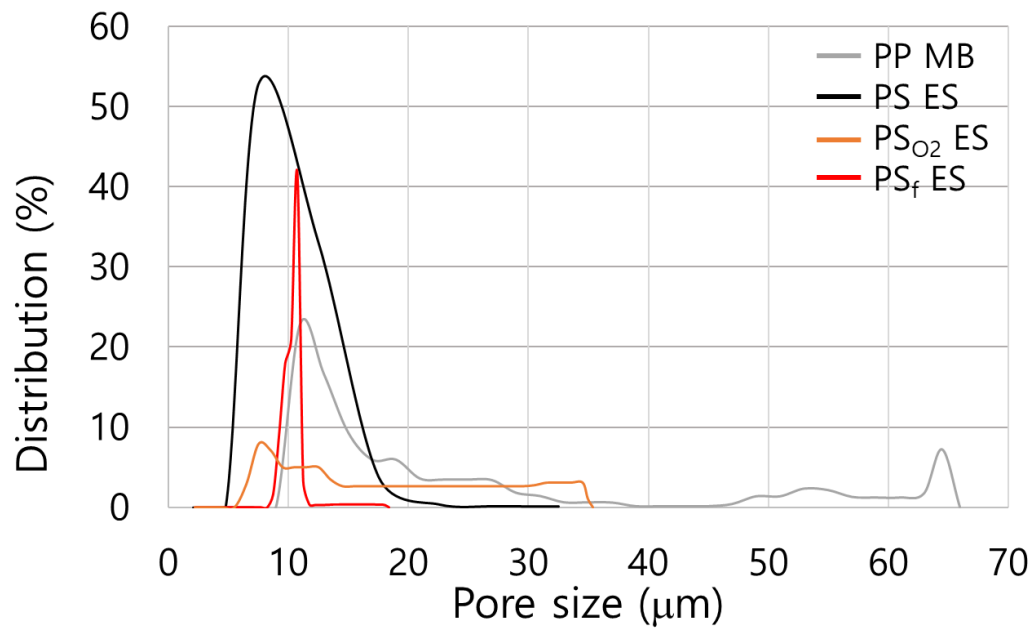

**Figure S1.** Pore size distribution of webs.

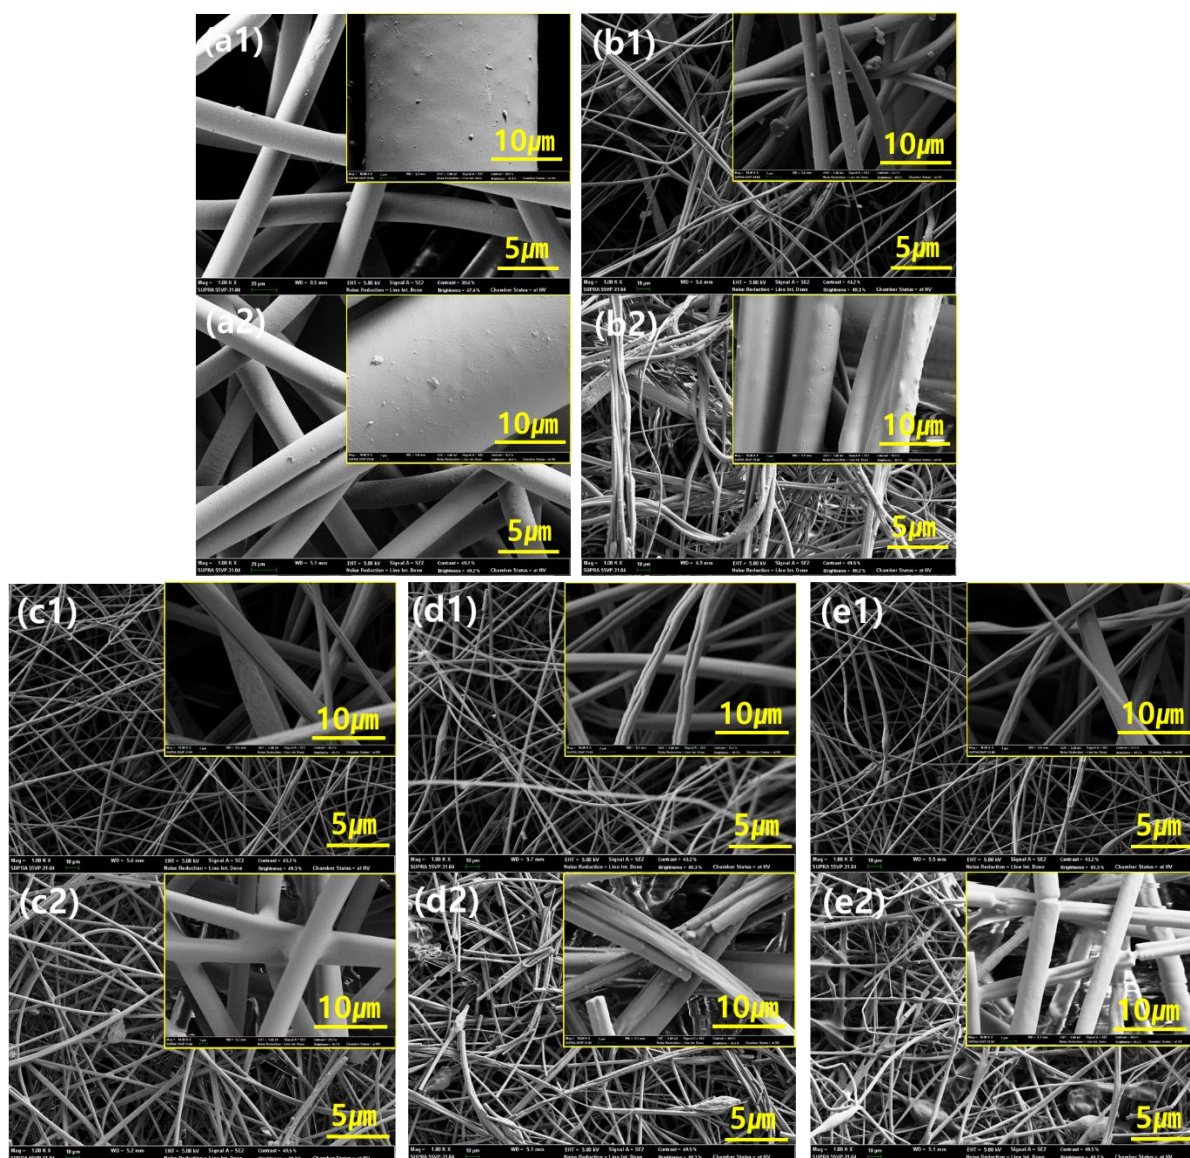

**Figure S2.** SEM images of different webs before and after 40 mg of DOP loading. (a1) PP SB; (a2) PP SB with DOP; (b1) PP MB; (b2) PP MB with DOP; (c1) PS ES; (c2) PS ES with DOP; (d1) PS<sub>02</sub> ES; (d2) PS<sub>02</sub> ES with DOP; (e1) PS<sub>f</sub> ES (e2) PS<sub>f</sub> ES with DOP.

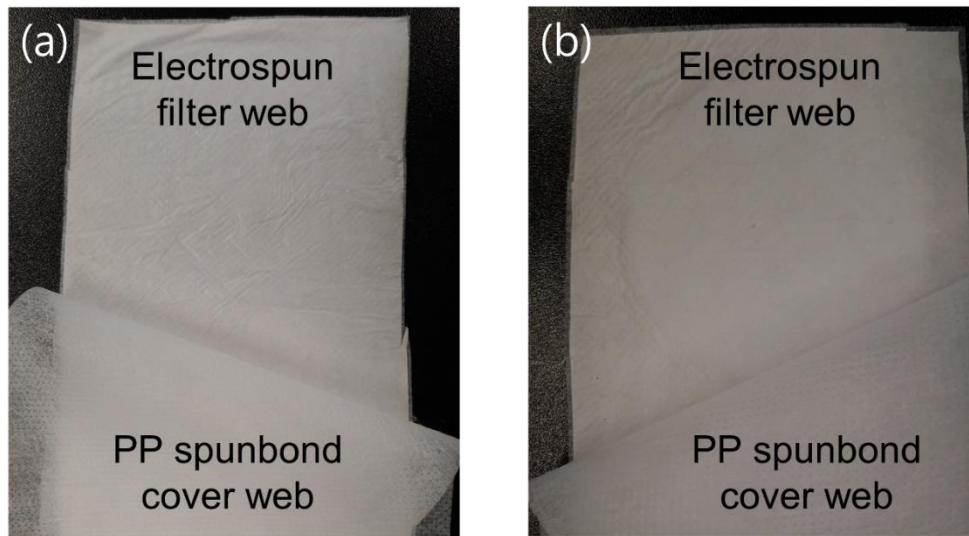

**Figure S3.** Electrospun filter web images before (a) and after (b) NaCl particle loading.
